# Supplementary material for: Effects of MWCNTs on Char Layer Structure and Physicochemical Reaction in Ethylene Propylene Diene Monomer Insulators
Source: MDPI journal article supplement (doi:10.3390/polym14153016), 2022-07-26
Supplement: s1 [file s1]

## **Supporting Information**

### **Effects of MWCNTs on char layer structure and ablative resistance of EPDM-based insulators**

*Zhiheng Chen<sup>a</sup>, Shida Han<sup>a</sup>, Yuan Ji<sup>a</sup>, Hong Wu<sup>a,\*</sup>, Shaoyun Guo<sup>a</sup>, Ning Yan<sup>b,\*\*</sup>,  
Hongyan Li<sup>b</sup>*

*<sup>a</sup>The State Key Laboratory of Polymer Materials Engineering, Polymer Research  
Institute of Sichuan University, Chengdu 610065, China*

*<sup>b</sup>Xi'an Modern Chemistry Research Institute, Shaanxi, Xi'an, 710065, China*

## 1. The dispersion of MWCNTs in EPDM-based insulators

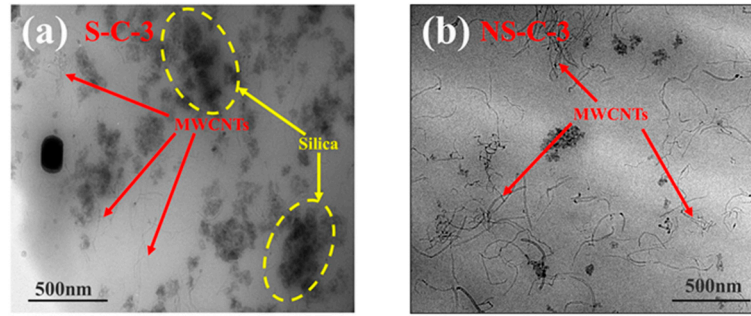

**Figure S1.** The dispersion of 3 phr MWCNTs in EPDM-based insulators with (a) and without silica (b).

## 2. TGA of MWCNTs, silica and EPDM-based insulators

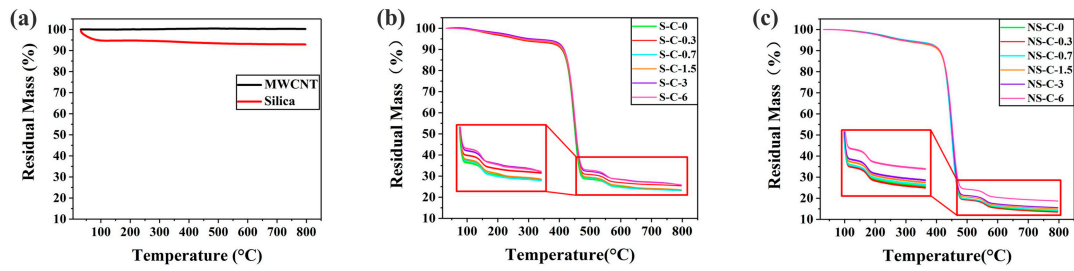

**Figure S2.** Thermal stability of MWCNTs (a) and the effects of MWCNTs content on the residual mass of insulators (group S (b), group NS (c)) after thermogravimetric analysis.

## 3. SEM image and pore diameter statistics of char layer surface in group NS

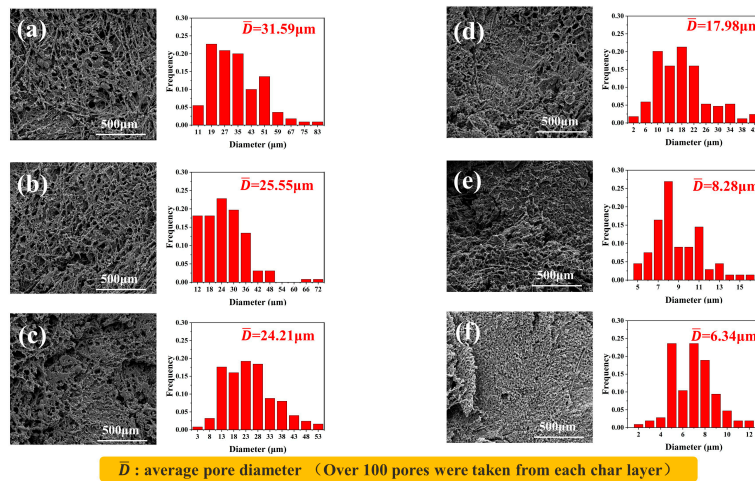

**Figure S3.** Effects of MWCNTs content on the average pore diameter of char layer surface of NS-C-0 (a), NS-C-0.3 (b), NS-C-0.7 (c), NS-C-1.5 (d), NS-C-3 (e), NS-C-6 (f).

#### 4. SEM image and EDS results of char layer section in group NS

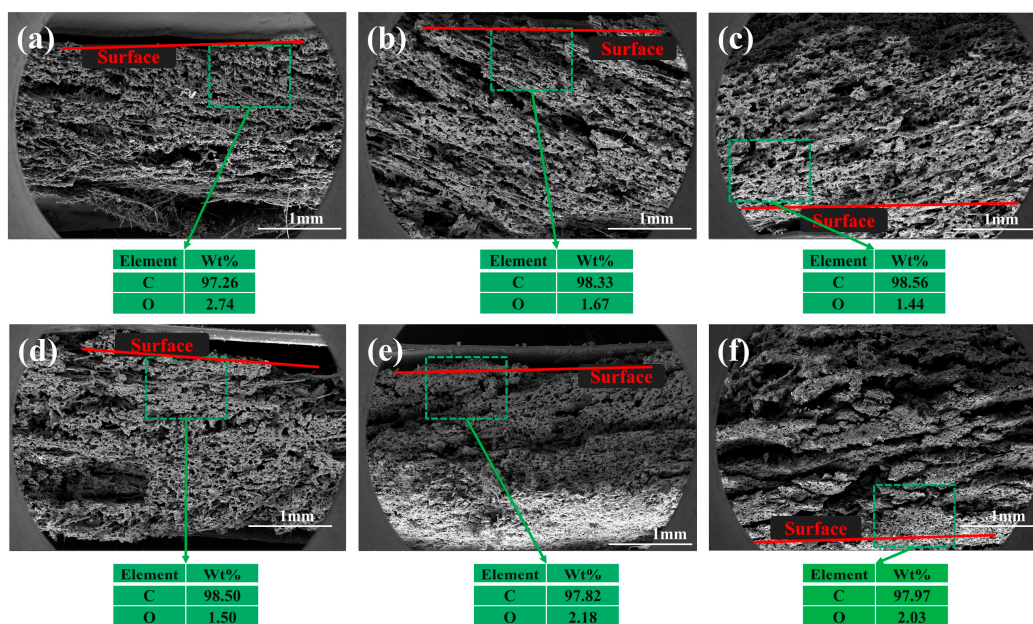

**Figure S4.** Effects of MWCNTs content on section structure and the element content of char layer: NS-C-0 (a), NS-C-0.3 (b), NS-C-0.7 (c), NS-C-1.5 (d), NS-C-3 (e), NS-C-6 (f).

#### 5. SEM image and pore diameter statistics of char layer surface in group S

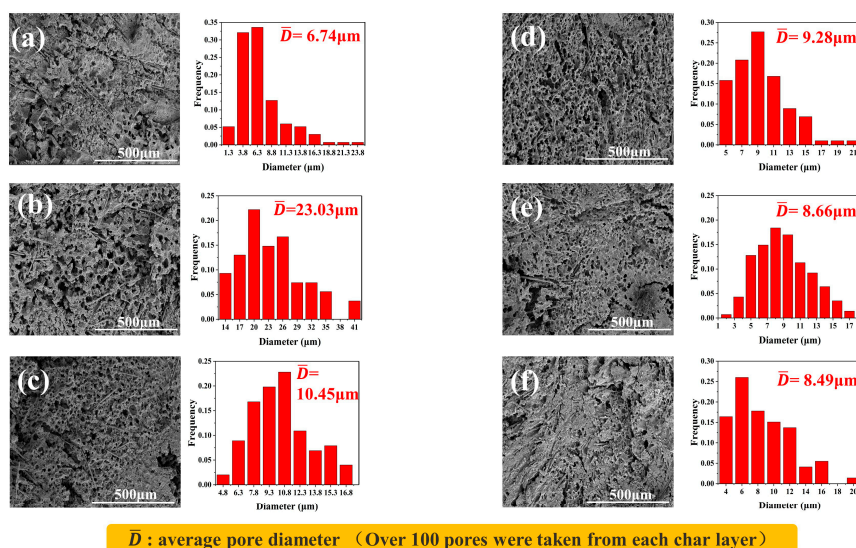

**Figure S5.** Effects of MWCNTs content on the average pore diameter of char layer surface of S-C-0 (a), S-C-0.3 (b), S-C-0.7 (c), S-C-1.5 (d), S-C-3 (e), S-C-6 (f).



## 6. SEM image and EDS results of char layer section in group S

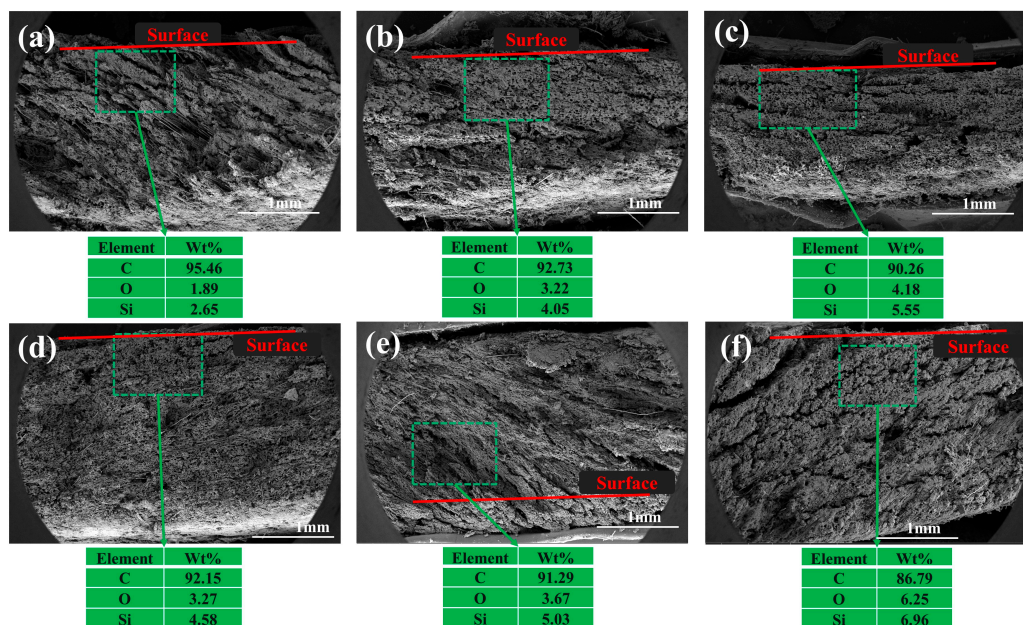

**Figure S6.** Effects of MWCNTs content on section structure and the element content of char layer: S-C-0 (a), S-C-0.3 (b), S-C-0.7 (c), S-C-1.5 (d), S-C-3 (e), S-C-6 (f)

## 7. Magnifying SEM image of char layer cross-section

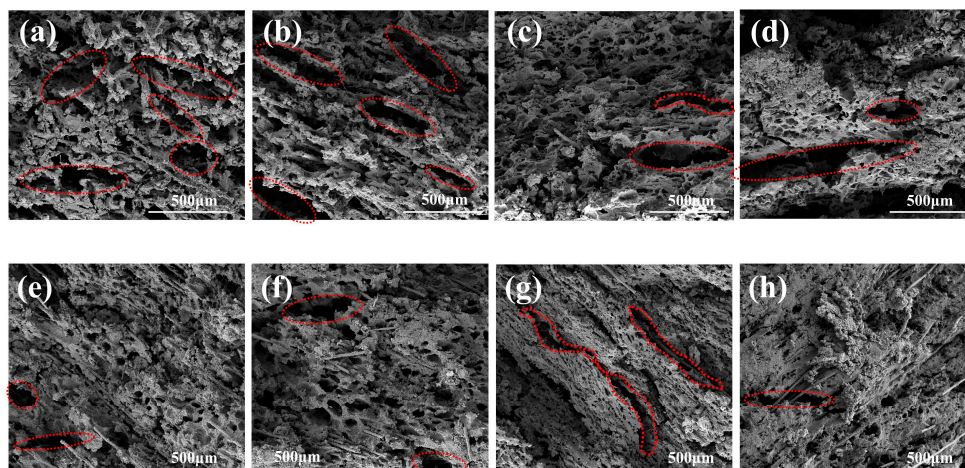

**Figure S7.** Effects of MWCNTs content on char layer cross-section of the EPDM-based insulators: NS-C-0 (a), NS-C-0.3 (b), NS-C-3 (c), NS-C-6 (d), S-C-0 (e), S-C-0.3 (f), S-C-3 (g) and S-C-6 (h).



## 8. Magnifying SEM image of char layer

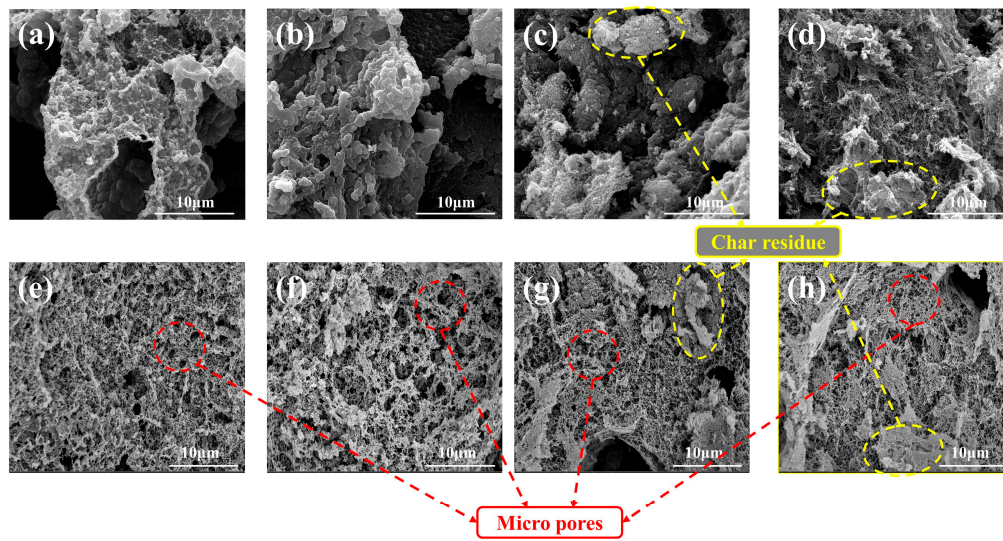

**Figure S8.** Effects of MWCNTs content on char layer surface of the EPDM-based insulators: NS-C-0 (a), NS-C-0.3 (b), NS-C-3 (c), NS-C-6 (d), S-C-0 (e), S-C-0.3 (f), S-C-3 (g) and S-C-6 (h).

**Table S1. Formulations of EPDM-based insulators (phra)**

| <b>Samples</b> | <b>EPDM (phr)</b> | <b>Silica (phr)</b> | <b>MWCNTs (phr)</b> |
|----------------|-------------------|---------------------|---------------------|
| S-C-0          | 100               | 20                  | 0                   |
| S-C-0.3        | 100               | 20                  | 0.3                 |
| S-C-0.7        | 100               | 20                  | 0.7                 |
| S-C-1.5        | 100               | 20                  | 1.5                 |
| S-C-3          | 100               | 20                  | 3                   |
| S-C-6          | 100               | 20                  | 6                   |
| NS-C-0         | 100               | 0                   | 0                   |
| NS-C-0.3       | 100               | 0                   | 0.3                 |
| NS-C-0.7       | 100               | 0                   | 0.7                 |
| NS-C-1.5       | 100               | 0                   | 1.5                 |
| NS-C-3         | 100               | 0                   | 3                   |
| NS-C-6         | 100               | 0                   | 6                   |

AF: 10phr, Boron phenolic resin: 20phr, Sulphur: 0.5phr, BIPB: 4phr, TAIC: 2phr, zinc oxide: 5phr, stearic acid: 1phr, Paraffin oil: 4phr.

<sup>a</sup> phr: parts per hundred grams of EPDM.

**Table S2. Effects of MWCNTs on mass ablation rate and linear ablation rate of EPDM-based insulators with and without silica.**

| <b>Samples</b> | <b>Rm (g/s)</b> | <b>Rd (mm/s)</b> | <b>Rc (mm/s)</b> |
|----------------|-----------------|------------------|------------------|
| S-C-0          | 0.0396±0.0028   | 0.0980±0.0039    | 0.1635±0.0054    |
| S-C-0.3        | 0.0480±0.0029   | 0.1029±0.0060    | 0.1807±0.0064    |
| S-C-0.7        | 0.0508±0.0037   | 0.1076±0.0014    | 0.1778±0.0070    |
| S-C-1.5        | 0.0412±0.0034   | 0.0973±0.0057    | 0.1656±0.0068    |
| S-C-3          | 0.0389±0.0023   | 0.0880±0.0061    | 0.1559±0.0037    |
| S-C-6          | 0.0427±0.0007   | 0.0837±0.0023    | 0.1519±0.0006    |
| NS-C-0         | 0.0413±0.0011   | 0.1173±0.0051    | 0.1901±0.0087    |
| NS-C-0.3       | 0.0413±0.0016   | 0.1092±0.0027    | 0.1911±0.0021    |
| NS-C-0.7       | 0.0376±0.0019   | 0.1004±0.0039    | 0.1832±0.0065    |
| NS-C-1.5       | 0.0402±0.0031   | 0.0904±0.0037    | 0.1790±0.0063    |
| NS-C-3         | 0.0366±0.0007   | 0.0801±0.0016    | 0.1714±0.0053    |
| NS-C-6         | 0.0390±0.0020   | 0.1011±0.0038    | 0.1720±0.0088    |



**Table S3. Effects of MWCNTs content on thermal conductivity and back-face temperature (T<sub>max</sub>, b) of EPDM-based insulators with and without silica.**

| Samples  | Back-face Temperature | Thermal Conductivity |
|----------|-----------------------|----------------------|
|          | (°C)                  | (W/mK)               |
| S-C-0    | 84.5±3.6              | 0.233±0.003          |
| S-C-0.3  | 86.8±3.1              | 0.238±0.004          |
| S-C-0.7  | 87.4±2.3              | 0.243±0.003          |
| S-C-1.5  | 98.0±6.7              | 0.258±0.002          |
| S-C-3    | 99.1±3.7              | 0.272±0.003          |
| S-C-6    | 106.1±3.8             | 0.304±0.006          |
| NS-C-0   | 66.1±2.9              | 0.221±0.003          |
| NS-C-0.3 | 68.0±4.0              | 0.220±0.001          |
| NS-C-0.7 | 72.1±4.0              | 0.228±0.005          |
| NS-C-1.5 | 78.9±5.4              | 0.235±0.003          |
| NS-C-3   | 81.3±3.2              | 0.253±0.001          |
| NS-C-6   | 97.9±2.1              | 0.289±0.002          |

**Table S4. Effects of MWCNTs on mechanical property of EPDM-based insulators with and without silica**

| Samples  | Tensile strength<br>(Mpa) | Elongation at break<br>(%) | Density (g/cm <sup>3</sup> ) |
|----------|---------------------------|----------------------------|------------------------------|
| S-C-0    | 5.51±0.41                 | 147.8±26.0                 | 1.035±0.002                  |
| S-C-0.3  | 5.79±0.22                 | 182.5±12.1                 | 1.040±0.001                  |
| S-C-0.7  | 5.89±0.16                 | 211.6±24.6                 | 1.042±0.001                  |
| S-C-1.5  | 5.98±0.33                 | 284.6±14.8                 | 1.051±0.002                  |
| S-C-3    | 6.07±0.25                 | 310.5±31.1                 | 1.058±0.005                  |
| S-C-6    | 6.31±0.14                 | 362.8±43.7                 | 1.064±0.002                  |
| NS-C-0   | 3.50±0.10                 | 17.5±2.3                   | 0.944±0.001                  |
| NS-C-0.3 | 3.77±0.31                 | 10.6±0.8                   | 0.951±0.001                  |
| NS-C-0.7 | 4.12±0.41                 | 14.2±0.6                   | 0.952±0.002                  |
| NS-C-1.5 | 5.02±0.18                 | 16.4±1.8                   | 0.960±0.004                  |
| NS-C-3   | 5.14±0.40                 | 27.7±2.3                   | 0.976±0.003                  |
| NS-C-6   | 5.31±0.21                 | 49.5±5.3                   | 0.994±0.001                  |
